# Supplementary material
Source: publisher site journal article supplement (https://www.dovepress.com/article/259996)
Supplement: Supplementary file 1 [file get_supplementary_file.php]

# Appendix. The Shahin Mixed Depression Scale (SMDS)

## *Shahin Mixed Depression Scale*

By Islam **Shahin**

- **Instructions:** Please read each statement carefully and decide whether it describes what you have been experiencing over the last week, including today.

- Only check YES to the statements representing experiences that **frequently**, (NOT RARELY), occurred during the last week, including today.

|                                                                                                  | YES | NO |
|--------------------------------------------------------------------------------------------------|-----|----|
| 1- I am unable to sit still.                                                                     |     |    |
| 2- I keep pacing back and forth.                                                                 |     |    |
| 3- I keep wringing my hands.                                                                     |     |    |
| 4- I keep pulling or rubbing on my hair, skin, or clothes.                                       |     |    |
| 5- I have unprovoked outbursts of complaining or shouting.                                       |     |    |
| 6- I feel very talkative.                                                                        |     |    |
| 7- a. I feel too much energy pent up inside my body like I am going to explode.                  |     |    |
| b. I feel a violent force inside me as if I wanted to smash everything.                          |     |    |
| c. I am unable to relax because I feel so tense.                                                 |     |    |
| 8- a. My mind is racing so much that I cannot focus on any one thing.                            |     |    |
| b. I have so many thoughts happening all at once that my head feels like it is about to explode. |     |    |
| 9- a. I have unprovoked feelings of rage.                                                        |     |    |
| b. I am so irritable that I shout at people or initiate fights or arguments.                     |     |    |
| 10- a. I describe my suffering so dramatically and exaggeratedly that others noticed that.       |     |    |
| b. I have frequent spells of weeping.                                                            |     |    |
| 11- a. It takes me longer to fall asleep.                                                        |     |    |
| b. I wake up in the middle of the night, and I can hardly go back to sleep.                      |     |    |
| 12- I go back and forth between feelings of sadness and feelings of happiness.                   |     |    |
| 13- a. I move so slowly that others noticed that.                                                |     |    |
| b. I talk so slowly that others noticed that.                                                    |     |    |
